# Supplementary material
Source: Springer Nature journal article supplement (https://www.springermedizin.de/resource/supplementary/13019_2010_312_MOESM4_ESM.pdf/9638366)

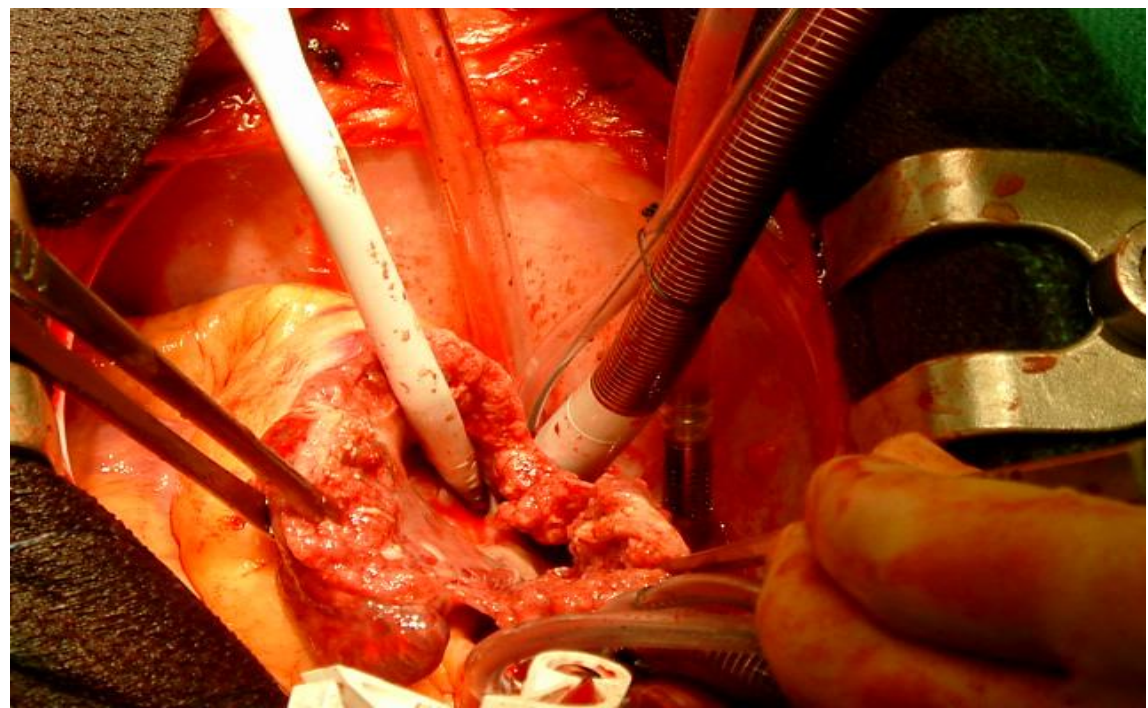

Supplement: MOESM4 [file 9638366]
